# Supplementary material for: TAK1 modulates satellite stem cell homeostasis and skeletal muscle repair
Source: PubMed Central journal article supplement (PMC4682113; doi:10.1038/ncomms10123), 2015-12-09
Supplement: ncomms10123-s1.pdf [file ncomms10123-s1.pdf]

Supplementary FIGURE 1

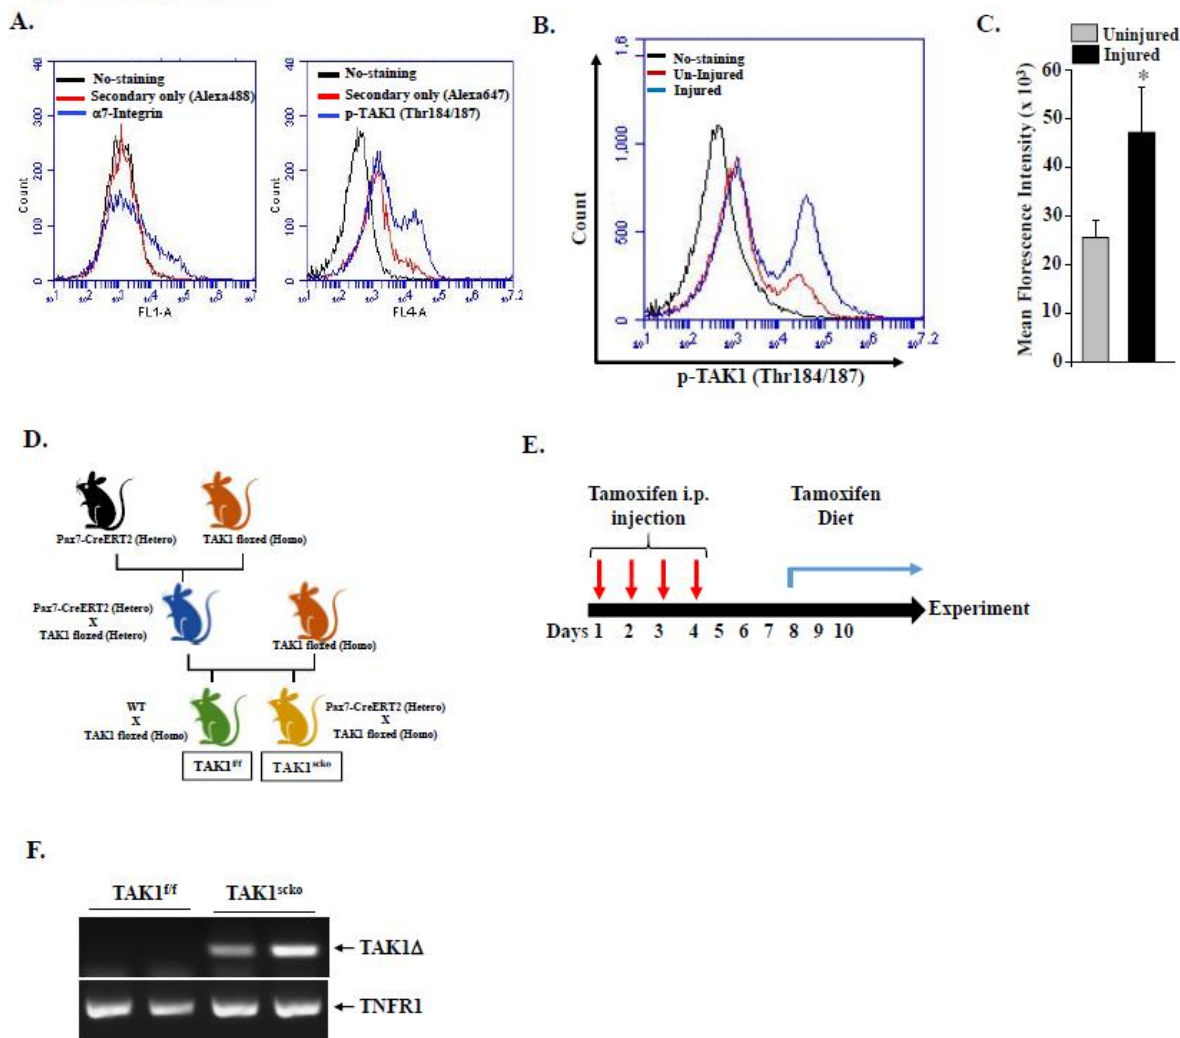

**Supplementary Fig. 1: Detection of phosphorylated TAK1 in satellite cells and generation of  $TAK1^{f/f}$  and  $TAK1^{sc}$  mice.** (A) Representative histograms showing the specificity of  $\alpha 7$ -integrin and phospho-TAK1 antibodies in FACS analysis. (B) Representative histogram presented here demonstrate the levels of phospho-TAK1 (Thr184/187) in satellite cells of uninjured and 5d-injured TA muscle of wild-type mice. (C) Quantification fluorescence intensity in FACS analysis for phospho-TAK1 (Thr184/187) in satellite cells of uninjured and injured TA muscle of wild-type mice.  $N=3$  in each group. Error bars represents standard deviation (SD).  $*p<0.01$ , values significantly different from contralateral uninjured TA muscle by unpaired t test. (D) Schematic illustration of the breeding strategy to obtain  $TAK1^{sc}$  and littermate  $TAK1^{f/f}$  mice. (E) Treatment protocol for tamoxifen-induced Cre recombination in  $TAK1^{sc}$  mice. (F) PCR analysis of genomic DNA from 4-hydroxy tamoxifen (TAM) treated  $TAK1^{f/f}$  and  $TAK1^{sc}$  cells using primer sets which detect truncated TAK1 and TNF receptor I (TNFR1). Representative PCR gel images presented here demonstrate that in vitro treatment with TAM for 48h efficiently delete kinase domain of TAK1 in  $TAK1^{sc}$  cells but not in  $TAK1^{f/f}$  cells.

Supplementary FIGURE 2

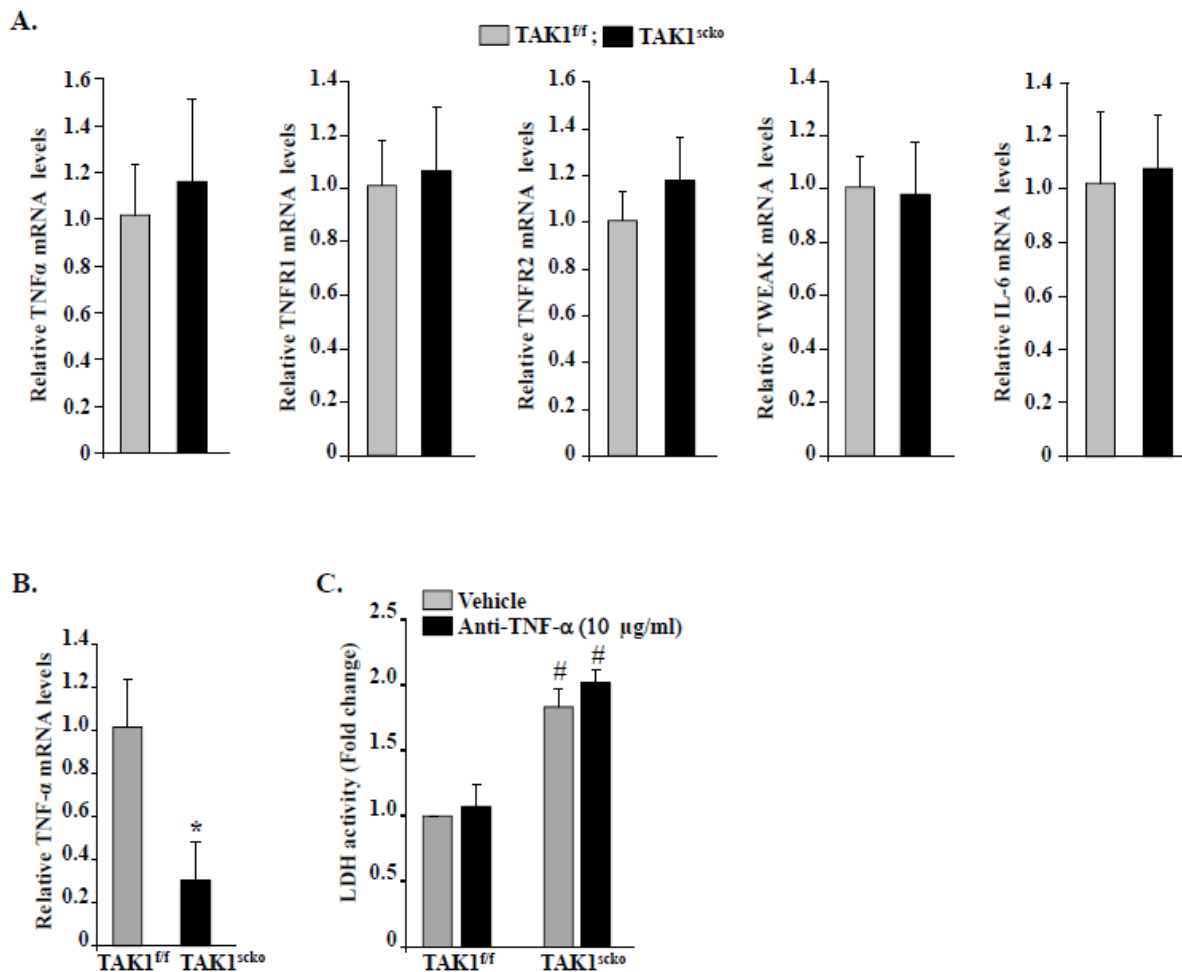

**Supplementary Fig 2: Effect of ablation of TAK1 in satellite cells on the gene expression of inflammatory cytokines. (A)** Relative mRNA levels of TNF- $\alpha$ , TNF receptor (TNFR) 1, TNFR2, TWEAK, and IL-6 in 5d-injured TA muscle of TAK1<sup>f/f</sup> and TAK1<sup>scko</sup> mice measured by QRT-PCR assays. **(B)** Relative mRNA levels of TNF- $\alpha$  in cultured TAK1<sup>f/f</sup> and TAK1<sup>scko</sup> cultures measured 72h after removal of TAM. **(C)** Primary myogenic cells isolated from non tamoxifen-treated TAK1<sup>f/f</sup> and TAK1<sup>scko</sup> mice were incubated with TAM for 48h. The cells were then washed and incubated in growth medium containing vehicle alone or mouse TNF- $\alpha$  neutralizing antibody (GeneTex, Clone # MAB0856) and after 72h the amounts of LDH in culture supernatants was measured. N=4 in each group for all the experiments. Error bars represent standard deviation (SD). \*p<0.05, values significantly different from TAK1<sup>f/f</sup> cultures by unpaired t test. #p<0.05, values significantly different from corresponding TAK1<sup>f/f</sup> or TAK1<sup>scko</sup> cultures incubated with vehicle alone by paired t test.

### Supplementary FIGURE 3

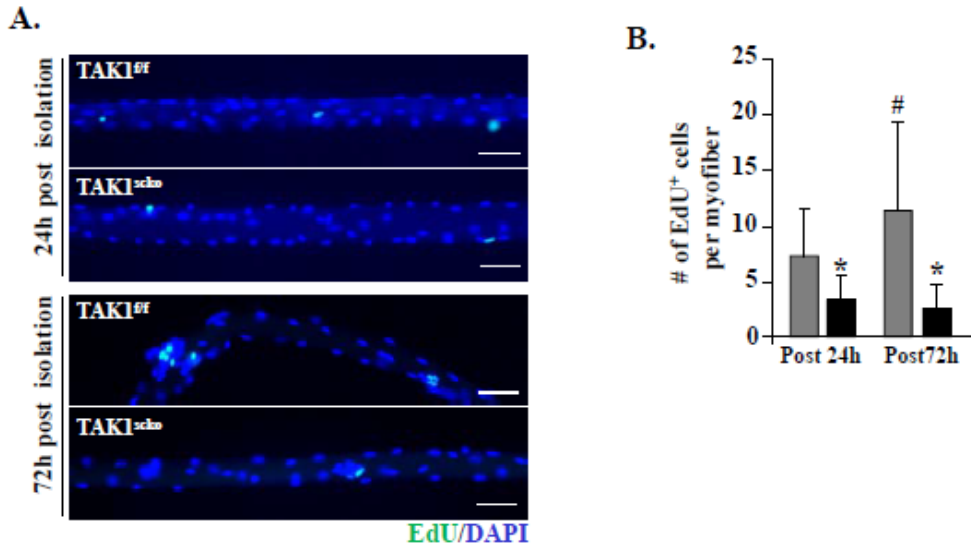

**Supplementary Fig. 3: Role of TAK1 in proliferation of myofiber-associated satellite cells.** Single myofibers cultures were established from EDL muscle of tamoxifen-treated TAK1<sup>f/f</sup> and TAK1<sup>sc</sup>ko mice and cultured for 24h or 72h. For last 90 min, the cells were pulse labelled with EdU by addition of EdU in culture medium. The myofibers cultures were then fixed with paraformaldehyde and stained for EdU. Nuclei was labelled by incubation in DAPI solution. **(A)** Representative merged images of EdU and DAPI staining are presented here. Scale bar: 100 $\mu$ m. **(B)** Quantification of number of EdU<sup>+</sup> nuclei per myofibers. N=3 mice per group. 10-12 myofiber were analyzed from each mouse. Error bars represent standard deviation (SD). \*p<0.05, values significantly different from TAK1<sup>f/f</sup> cultures at 24h or 72h by paired t test. #p<0.05, Values significantly different from TAK1<sup>f/f</sup> cultures at 24h by paired t test.

## Supplementary FIGURE 4

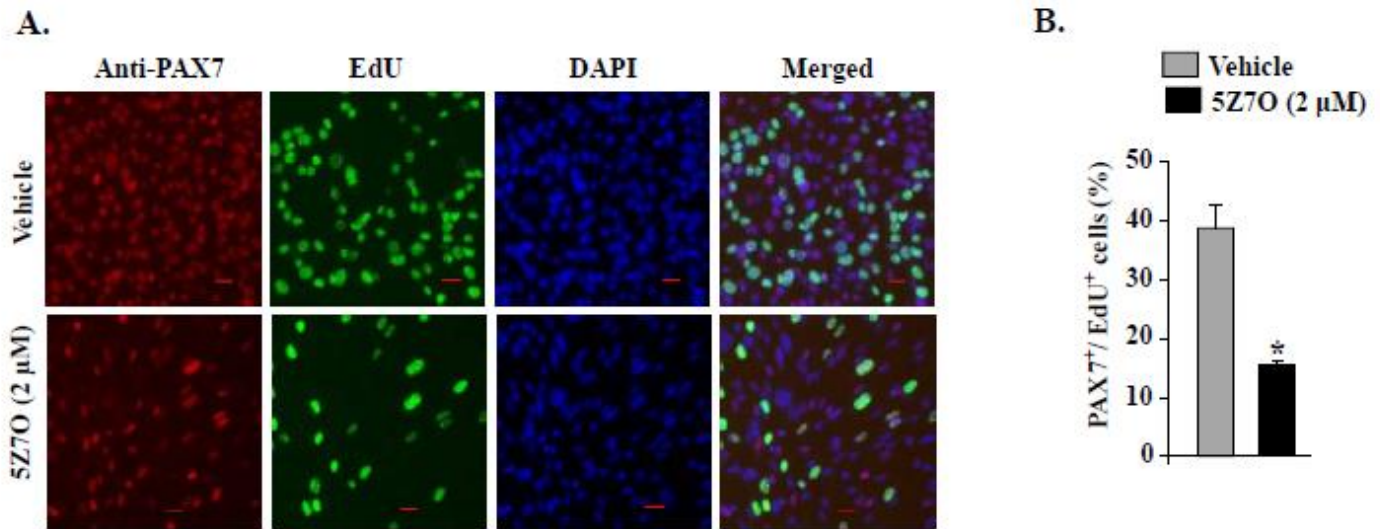

### Supplementary Fig. 4: Effect of pharmacological inhibition of TAK1 on proliferation of satellite cells.

Primary myogenic cells isolated from hind limb muscle of WT mice were treated with vehicle alone (i.e. DMSO) or 2 μM 5Z7O for 24h. For last 90 minutes, the cells were pulse labelled with EdU by addition of EdU in culture medium. The cultures were stained with anti-Pax7 and EdU. The nuclei were labeled using DAPI. **(A)** Representative individual and merged images of TAK1<sup>f/f</sup> and TAK1<sup>scko</sup> cultures after staining for Pax7, EdU, and nuclei (i.e. DAPI). Scale bar 20μm. **(B)** Quantitative estimation of percentage of Pax7<sup>+</sup>/EdU<sup>+</sup> double positive cells in control and 5Z7O-treated cultures. N=4 in each group. Error bars represent standard deviation (SD). \*p<0.01, values significantly different from vehicle treated cultures by unpaired t test.

## Supplementary FIGURE 5

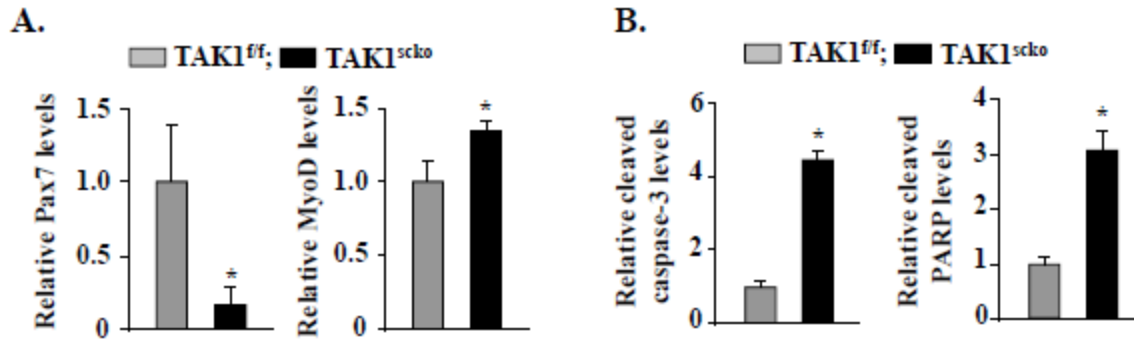

**Supplementary Fig. 5: Densitometry quantitative estimation of bands in immunoblots performed for TAK1<sup>f/f</sup> and TAK1<sup>scko</sup> cultures.** Immunoblots for this analysis are presented in the main figures. Densitometry quantification of amounts of **(A)** Pax7 and MyoD protein (from Fig. 5D), **(B)** Cleaved caspase-3 and cleaved PARP (from Fig. 6D) in TAK1<sup>f/f</sup> and TAK1<sup>scko</sup> cultures. N=3 in each group. Error bars represent standard deviation (SD). \*p<0.05, values significantly different from corresponding TAK1<sup>f/f</sup> cultures by unpaired t test.

# Supplementary FIGURE 6:

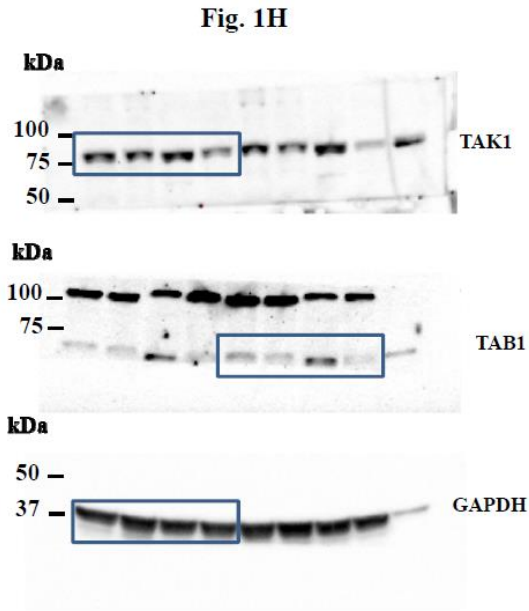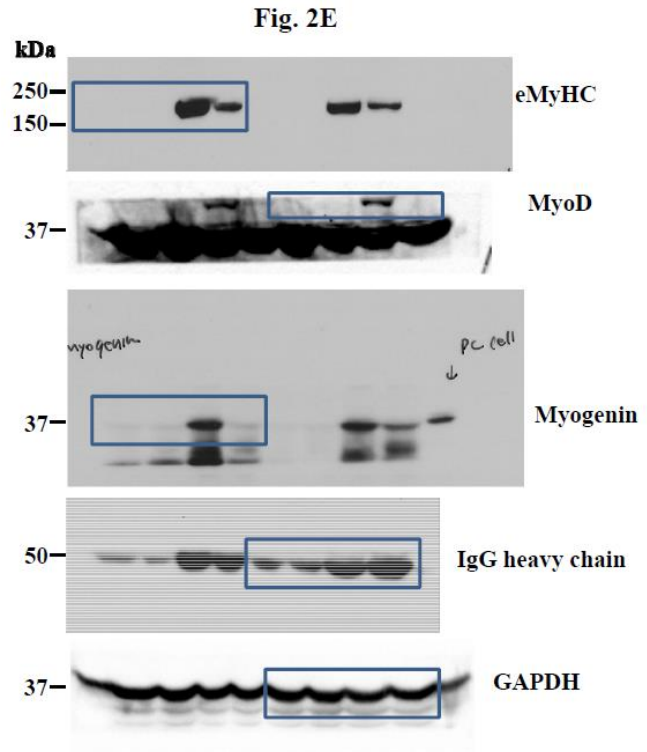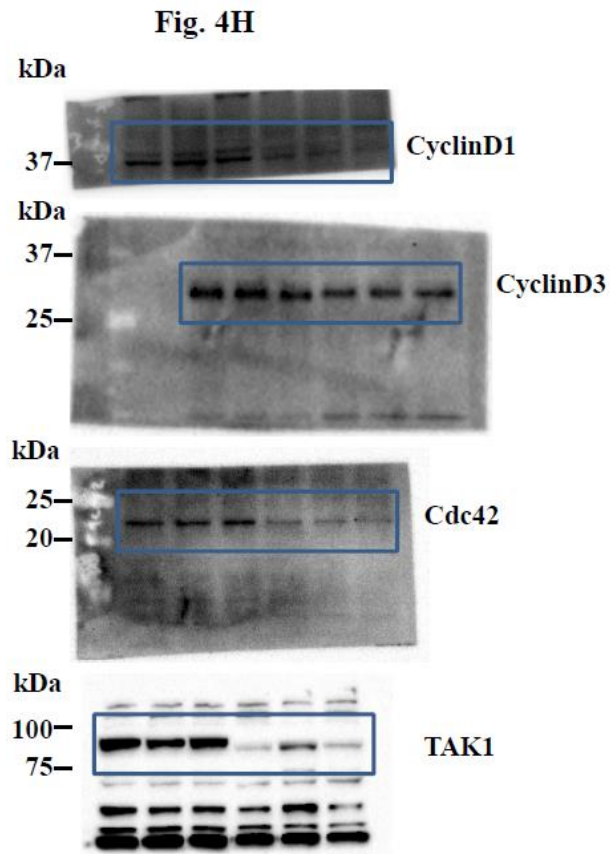

# Supplementary FIGURE 6 (Continuation)

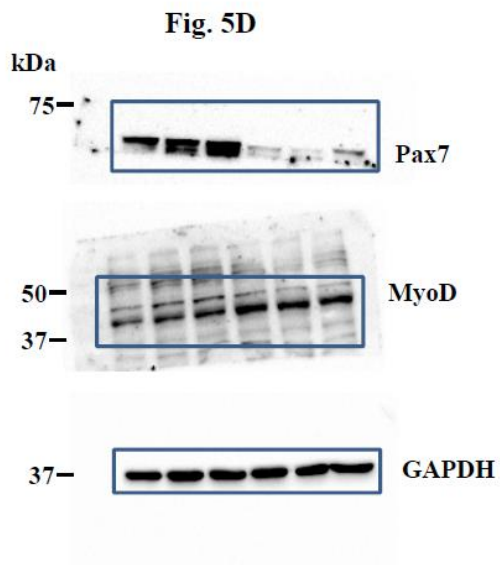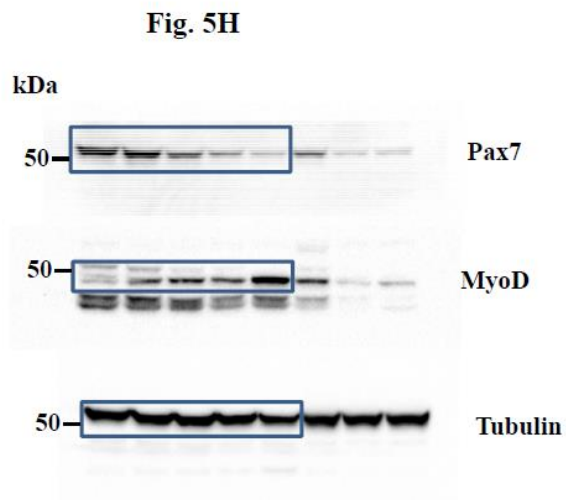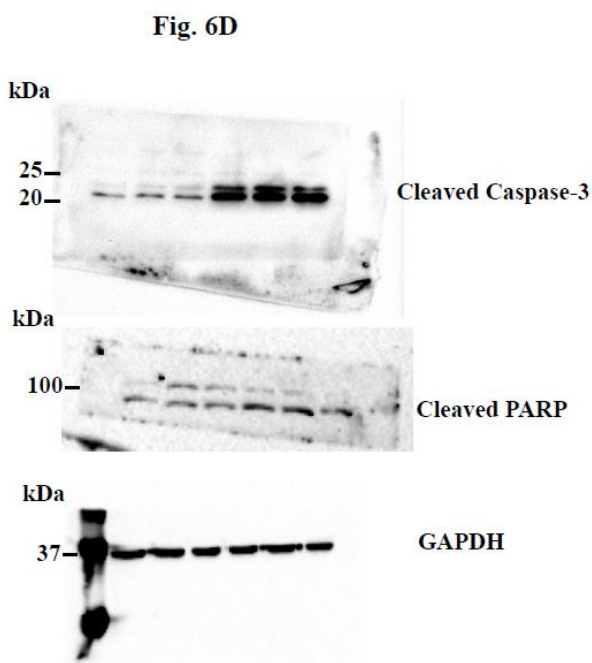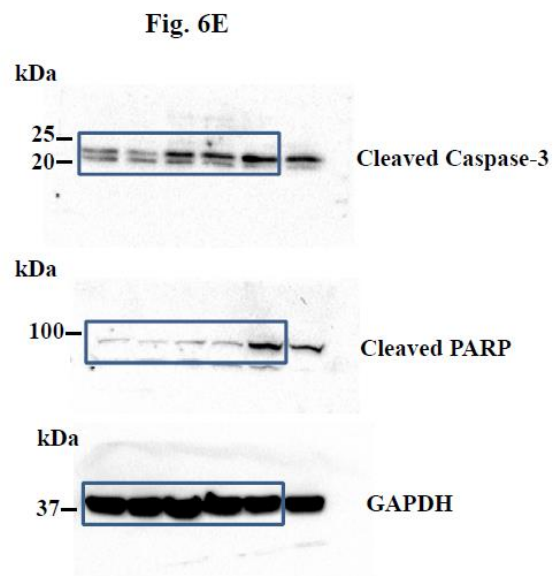

Supplementary FIGURE 6 (Continuation)

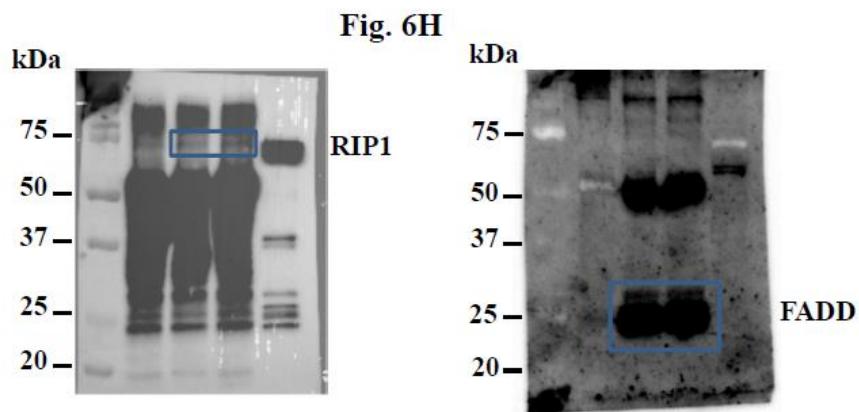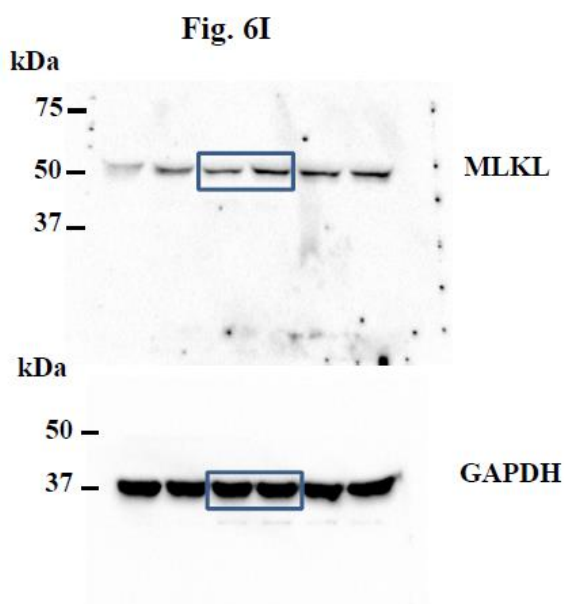



# Supplementary FIGURE 6 (Continuation)

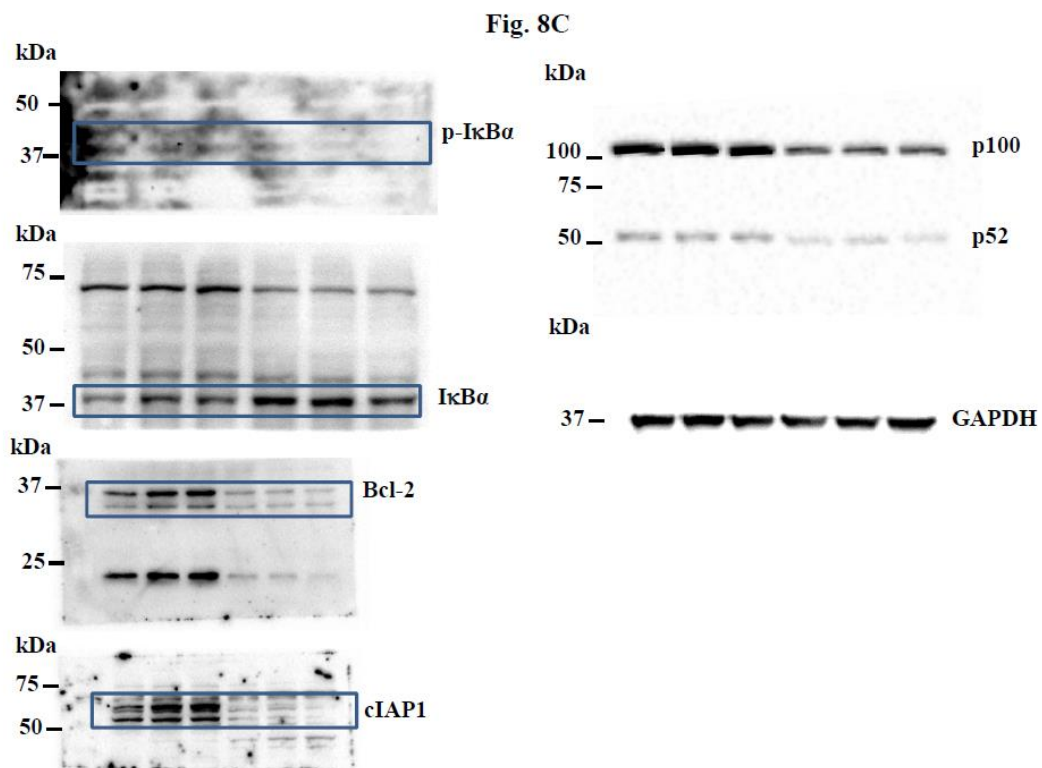

Supplementary FIGURE 6 (Continuation)

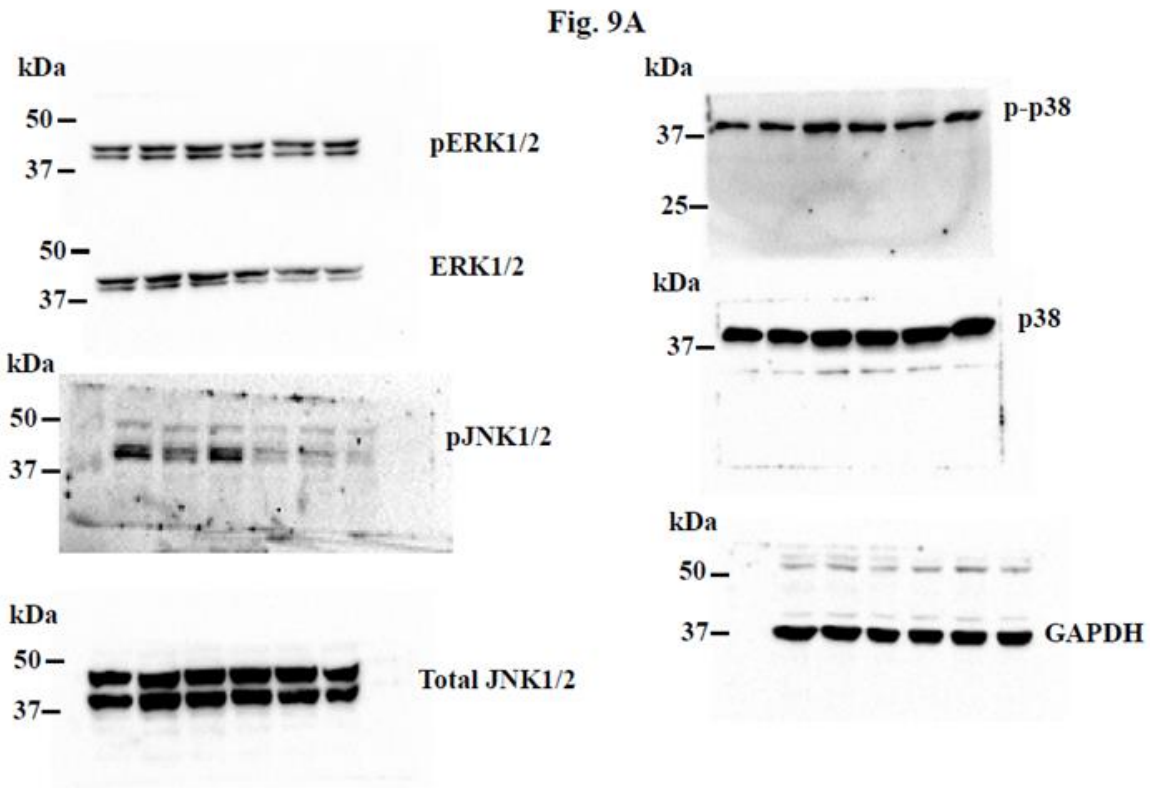

**Supplementary Fig. 6. Uncropped images of immunoblots with molecular weight markers.** The immunoblots presented here are the uncropped images for their corresponding figures in main manuscript. Bands marked in the rectangles were used where there are multiple bands in the same immunoblots. Molecular weight markers are presented on left side of these immunoblots.

**Supplementary Table 1:** Antibodies and their dilution used in this study.

| <b>Antibody</b>                                      | <b>Company</b>                    | <b>Dilution</b> | <b>Analysis</b>            |
|------------------------------------------------------|-----------------------------------|-----------------|----------------------------|
| Monoclonal rabbit-anti-phospho-TAK1                  | Thermo Scientific # MA5-15073     | 1:50            | FACS                       |
| Monoclonal mouse-anti-Integrin $\alpha 7$            | MBL International Corporation     | 1:240           | FACS                       |
| Monoclonal mouse-anti-CD31                           | eBIOSCIENCE #12-0311-82           | 1:428           | FACS                       |
| Monoclonal mouse-anti-CD45                           | eBIOSCIENCE #12-0451-83           | 1:428           | FACS                       |
| Monoclonal mouse-anti-Sca1                           | eBIOSCIENCE #12-5981-82           | 1:428           | FACS                       |
| Monoclonal mouse-anti-TER-119                        | eBIOSCIENCE #12-5921-82           | 1:428           | FACS                       |
| Polyclonal rabbit anti-total TAK1                    | Cell Signaling Technology # 4505  | 1:1000          | WB                         |
| Polyclonal rabbit anti-total TAB1                    | Cell Signaling Technology # 3225  | 1:1000          | WB                         |
| Polyclonal rabbit anti-phospho-ERK1/2                | Cell Signaling Technology # 9101  | 1:1000          | WB                         |
| Polyclonal rabbit anti-total-ERK1/2                  | Cell Signaling Technology # 9102  | 1:1000          | WB                         |
| Polyclonal rabbit anti-phospho-JNK1/2                | Cell Signaling Technology # 9251  | 1:1000          | WB                         |
| Polyclonal rabbit anti-total-JNK1/2                  | Cell Signaling Technology # 9252  | 1:1000          | WB                         |
| Polyclonal rabbit anti-phospho-p38                   | Cell Signaling Technology # 9211  | 1:500           | WB                         |
| Polyclonal rabbit anti-total p38                     | Cell Signaling Technology # 9212  | 1:1000          | WB                         |
| Monoclonal rabbit-anti-phospho-I $\kappa$ B $\alpha$ | Cell Signaling Technology # 2859  | 1:500           | WB                         |
| Monoclonal rabbit-anti-total I $\kappa$ B $\alpha$   | Cell Signaling Technology # 4812  | 1:1000          | WB                         |
| Monoclonal-rabbit-anti-cleaved caspase 3             | Cell Signaling Technology # 9664  | 1:1000          | WB                         |
| Polyclonal rabbit-anti-cleaved PARP                  | Cell Signaling Technology # 9544  | 1:1000          | WB                         |
| Polyclonal rabbit-anti-p100/p52                      | Cell Signaling Technology # 4882  | 1:500           | WB                         |
| Monoclonal rabbit-anti-GAPDH                         | Cell Signaling Technology # 2118  | 1:2000          | WB                         |
| Monoclonal rat-anti-MLKL                             | Millipore, MABC604                | 1:1000          | WB                         |
| Polyclonal goat-anti-FADD                            | Santa Cruz Biotechnology, sc-6035 | 1:500           | WB                         |
| Polyclonal rabbit-anti-c-IAP1                        | Santa Cruz Biotechnology, sc-7943 | 1:500           | WB                         |
| Monoclonal mouse-anti-Bcl-2                          | BD Biosciences #556358            | 1:1000          | WB                         |
| Polyclonal rabbit-anti-Cyclin D3                     | Santa Cruz Biotechnology, sc-182  | 1:500           | WB                         |
| Monoclonal mouse-anti-Cdc42                          | Santa Cruz Biotechnology, sc-8401 | 1:500           | WB                         |
| Monoclonal mouse-anti-Pax7                           | DSHB Pax7                         | 1:1000          | WB                         |
| Monoclonal mouse-anti-eMyHC                          | DSHB F1.652                       | 1:1000          | WB                         |
| Polyclonal rabbit-anti-MyoD                          | Santa Cruz Biotechnology, sc-304  | 1:1000          | WB                         |
| Polyclonal rabbit-anti-myogenin                      | Santa Cruz Biotechnology, sc-576  | 1:500           | WB                         |
| Monoclonal mouse-anti-RIP                            | BD Biosciences #610458            | 1:500           | WB                         |
| Monoclonal mouse-anti-eMyHC                          | DSHB F1.652                       | 1:250           | Immunohistochemistry       |
| Polyclonal rabbit-anti-Laminin                       | Sigma, L9393                      | 1:500           | Immunohistochemistry       |
| Monoclonal mouse-anti-Pax7                           | DSHB Pax7                         | 1:10            | Immunohisto/cyto-chemistry |
| Polyclonal rabbit-anti-MyoD                          | Santa Cruz Biotechnology, sc-304  | 1:200           | Immunocytochemistry        |
| Monoclonal rat-anti-TNF- $\alpha$                    | GeneTex, MAB0856                  | 1:20            | Neutralization             |

**Supplementary Table 2.** Sequence of the primers used for QRT-PCR analyses.

| <b>Gene</b>    | <b>Sequence (5' → 3')</b>                                                 |
|----------------|---------------------------------------------------------------------------|
| TAK1           | GTCATCCAGCCCTAGTGTGTCAGAAT (Forward)<br>TTCTTTGGAGTTTGGGCACG (Reverse)    |
| TNF $\alpha$   | GCATGATCCGCGACGTGGAA (Forward)<br>AGATCCATGCCGTTGGCCAG (Reverse)          |
| TNFR1          | AACCAGTTCCAACGCTACCTGA (forward)<br>AGAAAGAACCCTGCATGGCA (reverse)        |
| TNFR2          | TAAGTGCCATCCCAAGGACACTCT (forward)<br>CCCAGTGATGTCACCTCCAACAATC (reverse) |
| TWEAK          | GCTACGACCGCCAGATTGGG (forward)<br>GCCAGCACACCGTTCACCAG (reverse)          |
| IL-6           | CCTTCTTGGGACTGATGCTGG (forward)<br>GCCTCCGACTTGTGAAGTGGT (reverse)        |
| Pax-7          | CAGTGTGCCATCTACCCATGCTTA (Forward)<br>GGTGCTTGGTTCAAATTGAGCC (Reverse)    |
| Myf5           | TGAAGGATGGACATGACGGACG (Forward)<br>TTGTGTGCTCCGAAGGCTGCTA (Reverse)      |
| MyoD           | TGGGATATGGAGCTTCTATCGC (Forward)<br>GGTGAGTCGAAACACGGATCAT (Reverse)      |
| Myogenin       | CATCCAGTACATTGAGCGCCTA (Forward)<br>GAGCAAATGATCTCCTGGGTTG (Reverse)      |
| Myh3           | ACATCTCTATGCCACCTTCGCTAC (Forward)<br>GGGTCTTGGTTTCGTTGGGTAT (Reverse)    |
| HeyL           | CAGATGCAAGCCCGGAAGAA (Forward)<br>ACCAGAGGCATGGAGCATCT (Reverse)          |
| Hes1           | GCACAGAAAGTCATCAAAGCC (Forward)<br>TTGATCTGGGTCATGCAGTTG (Reverse)        |
| Hes6           | GCCGGATTTGGTGTCTACAT (Forward)<br>TCCTGAGCTGTCTCCACCTT (Reverse)          |
| $\beta$ -actin | CAGGCATTGCTGACAGGATG-3' (Forward)<br>TGCTGATCCACATCTGCTGG (Reverse)       |
